# Supplementary material for: Cancer risks in a population-based study of 70,570 agricultural workers: results from the Canadian census health and Environment cohort (CanCHEC)
Source: PubMed Central journal article supplement (PMC5437486; doi:10.1186/s12885-017-3346-x), 2017-05-19
Supplement: 12885_2017_3346_MOESM1_ESM.pdf [file 12885_2017_3346_MOESM1_ESM.pdf]

**Table S1:** Hazard ratios (HR) and 95% confidence intervals (CI) for selected cancers among male agricultural workers in a sub-cohort of CanCHEC that excludes all individuals with a cancer diagnosis within 10 years of cohort inception (1981-1991)

| Cancer Site (ICD-O-3)             | Agricultural Workers |                       | Farmers and managers |                       | Manual labourers |                       |
|-----------------------------------|----------------------|-----------------------|----------------------|-----------------------|------------------|-----------------------|
|                                   | HR                   | (95% CI) <sup>1</sup> | HR                   | (95% CI) <sup>1</sup> | HR               | (95% CI) <sup>1</sup> |
| Any cancer <sup>2</sup>           | 0.95                 | (0.93-0.98)           | 0.94                 | (0.92-0.97)           | 0.98             | (0.94-1.03)           |
| Prostate (C61.9)                  | 1.11                 | (1.06-1.16)           | 1.12                 | (1.07-1.18)           | 1.07             | (0.99-1.17)           |
| Lung (C34)                        | 0.75                 | (0.70-0.80)           | 0.70                 | (0.64-0.75)           | 0.91             | (0.81-1.02)           |
| Colon (C18, C26.0)                | 0.89                 | (0.82-0.97)           | 0.89                 | (0.81-0.99)           | 0.89             | (0.75-1.04)           |
| Rectum (C19.9, C20.9)             | 1.05                 | (0.94-1.16)           | 1.09                 | (0.97-1.22)           | 0.92             | (0.75-1.13)           |
| Non-Hodgkin Lymphoma <sup>3</sup> | 1.11                 | (1.00-1.22)           | 1.11                 | (0.99-1.24)           | 1.10             | (0.92-1.32)           |
| Bladder (C67)                     | 0.82                 | (0.74-0.91)           | 0.82                 | (0.73-0.93)           | 0.80             | (0.66-0.98)           |
| Melanoma (C44)                    | 1.15                 | (1.01-1.31)           | 1.21                 | (1.04-1.40)           | 1.00             | (0.77-1.29)           |
| Leukemia <sup>3</sup>             | 1.10                 | (0.96-1.26)           | 1.12                 | (0.96-1.31)           | 1.05             | (0.82-1.35)           |
| Oral (C00-C14)                    | 1.04                 | (0.91-1.19)           | 0.96                 | (0.81-1.13)           | 1.25             | (1.00-1.57)           |
| Lip (C00.0-C00.9)                 | 2.10                 | (1.65-2.66)           | 2.17                 | (1.67-2.82)           | 1.85             | (1.18-2.92)           |
| Kidney (C64.9)                    | 0.77                 | (0.67-0.89)           | 0.79                 | (0.67-0.92)           | 0.72             | (0.55-0.95)           |
| Stomach (C16)                     | 0.91                 | (0.79-1.05)           | 0.87                 | (0.74-1.04)           | 1.01             | (0.79-1.29)           |
| Pancreas (C25)                    | 0.92                 | (0.78-1.09)           | 0.88                 | (0.72-1.06)           | 1.05             | (0.79-1.40)           |
| Multiple myeloma <sup>3</sup>     | 1.12                 | (0.93-1.36)           | 1.11                 | (0.89-1.39)           | 1.15             | (0.82-1.61)           |
| Brain (C70-C72)                   | 0.87                 | (0.71-1.07)           | 0.81                 | (0.64-1.04)           | 1.02             | (0.73-1.42)           |
| Esophagus (C15)                   | 0.86                 | (0.69-1.06)           | 0.77                 | (0.59-0.99)           | 1.12             | (0.78-1.62)           |
| Thyroid (C73.9)                   | 0.95                 | (0.71-1.28)           | 0.95                 | (0.68-1.34)           | 0.95             | (0.55-1.64)           |
| Larynx (C32)                      | 0.53                 | (0.40-0.70)           | 0.39                 | (0.27-0.57)           | 0.90             | (0.59-1.36)           |
| Liver (C22.0, C22.1)              | 0.51                 | (0.38-0.68)           | 0.42                 | (0.29-0.61)           | 0.76             | (0.48-1.21)           |
| Testis (C62)                      | 0.96                 | (0.68-1.36)           | 1.00                 | (0.64-1.55)           | 0.91             | (0.53-1.58)           |
| Hodgkin Lymphoma <sup>3</sup>     | 0.76                 | (0.47-1.23)           | 0.68                 | (0.37-1.25)           | 0.92             | (0.43-1.94)           |
| Mesothelioma <sup>3</sup>         | 0.58                 | (0.37-0.92)           | 0.57                 | (0.34-0.97)           | 0.61             | (0.25-1.47)           |
| Breast (C50)                      | 1.32                 | (0.78-2.25)           | 1.01                 | (0.50-2.01)           | 2.14             | (1.00-4.58)           |
| Nasal (C30)                       | 0.72                 | (0.40-1.32)           | 0.79                 | (0.39-1.58)           | 0.60             | (0.22-1.67)           |
| Bone (C40, C41)                   | 0.70                 | (0.36-1.35)           | -                    | -                     | -                | -                     |

<sup>1</sup> Adjusted for age at baseline (age group categories), province of residence at baseline, and education level at baseline

<sup>2</sup> Incident primary cancers excluding non-melanoma skin cancer

<sup>3</sup> Cancers defined using ICD-O-3 Histology codes: Mesothelioma (9050–9055), Hodgkin lymphoma (9650–9667); non-Hodgkin lymphoma (9590–9596, 9670–9719, 9727–9729, 9823, 9827); Multiple myeloma (9731, 9732, 9734); Leukemia (9733, 9742, 9800–9801, 9805, 9820, 9826, 9831–9837, 9840, 9860–9861, 9863, 9866–9867, 9870–9876, 9891, 9895–9897, 9910, 9920, 9930–9931, 9940, 9945–9946, 9948, 9963–9964, 9823, 9827)

Note: case counts below 5 have been suppressed and all counts have been randomly rounded to base 5 in accordance with Statistics Canada disclosure rules
