# Supplementary material for: Cancer risks in a population-based study of 70,570 agricultural workers: results from the Canadian census health and Environment cohort (CanCHEC)
Source: Springer Nature journal article supplement (doi:10.1186/s12885-017-3346-x), 2017-05-19
Supplement: MOESM2 [file 12300470]

**Table S2:** Hazard ratios (HR) and 95% confidence intervals (CI) for selected cancers among female agricultural workers in a sub-cohort of CanCHEC that excludes all individuals with a cancer diagnosis within 10 years of cohort inception (1981-1991)

| Cancer Site (ICD-O-3)             | Agricultural Workers |                       | Farmers and managers |                       | Manual labourers |                       |
|-----------------------------------|----------------------|-----------------------|----------------------|-----------------------|------------------|-----------------------|
|                                   | HR                   | (95% CI) <sup>1</sup> | HR                   | (95% CI) <sup>1</sup> | HR               | (95% CI) <sup>1</sup> |
| Any cancer <sup>2</sup>           | 0.92                 | (0.88-0.96)           | 0.96                 | (0.90-1.02)           | 0.88             | (0.83-0.84)           |
| Breast (C50)                      | 0.93                 | (0.86-1.00)           | 0.93                 | (0.83-1.03)           | 0.92             | (0.83-1.03)           |
| Lung (C34)                        | 0.58                 | (0.50-0.66)           | 0.56                 | (0.46-0.69)           | 0.59             | (0.49-0.72)           |
| Colon (C18, C26.0)                | 0.94                 | (0.82-1.09)           | 1.20                 | (1.00-1.44)           | 0.71             | (0.56-0.89)           |
| Non-Hodgkin Lymphoma <sup>3</sup> | 1.04                 | (0.87-1.23)           | 1.18                 | (0.93-1.49)           | 0.91             | (0.71-1.17)           |
| Rectum (C19.9, C20.9)             | 1.04                 | (0.84-1.28)           | 1.03                 | (0.76-1.39)           | 1.05             | (0.79-1.39)           |
| Melanoma (C44)                    | 1.15                 | (0.93-1.42)           | 1.02                 | (0.74-1.42)           | 1.26             | (0.96-1.65)           |
| Ovary (C56.9)                     | 1.01                 | (0.81-1.26)           | 0.92                 | (0.66-1.28)           | 1.09             | (0.81-1.47)           |
| Leukemia <sup>3</sup>             | 1.24                 | (0.98-1.58)           | 1.74                 | (1.29-2.35)           | 0.84             | (0.58-1.23)           |
| Thyroid (C73.9)                   | 1.26                 | (0.99-1.60)           | 1.23                 | (0.86-1.76)           | 1.28             | (0.94-1.75)           |
| Pancreas (C25)                    | 1.32                 | (1.03-1.69)           | 1.23                 | (0.88-1.74)           | 1.42             | (1.01-1.98)           |
| Bladder (C67)                     | 0.90                 | (0.67-1.20)           | 0.86                 | (0.56-1.33)           | 0.92             | (0.92-1.37)           |
| Kidney (C64.9)                    | 0.79                 | (0.58-1.08)           | 0.86                 | (0.57-1.30)           | 0.71             | (0.45-1.14)           |
| Brain (C70-C72)                   | 1.26                 | (0.92-1.72)           | 1.45                 | (0.96-2.21)           | 1.08             | (0.69-1.71)           |
| Cervix (C53)                      | 0.82                 | (0.59-1.14)           | 0.71                 | (0.42-1.20)           | 0.91             | (0.60-1.38)           |
| Stomach (C16)                     | 0.92                 | (0.64-1.31)           | 1.18                 | (0.75-1.85)           | 0.67             | (0.38-1.92)           |
| Oral (C00-C14)                    | 0.77                 | (0.53-1.11)           | 0.73                 | (0.44-1.22)           | 0.81             | (0.48-1.38)           |
| Lip (C00.0-C00.9)                 | -                    | -                     | -                    | -                     | -                | -                     |
| Multiple myeloma <sup>3</sup>     | 0.81                 | (0.54-1.21)           | 0.51                 | (0.27-0.95)           | 1.30             | (0.78-2.18)           |
| Liver (C22.0, C22.1)              | 0.93                 | (0.53-1.63)           | 0.91                 | (0.43-1.95)           | 0.95             | (0.42-2.15)           |
| Esophagus (C15)                   | 1.10                 | (0.62-1.94)           | 1.47                 | (0.69-3.14)           | 0.84             | (0.37-1.92)           |
| Mesothelioma <sup>3</sup>         | -                    | -                     | -                    | -                     | -                | -                     |
| Larynx (C32)                      | -                    | -                     | -                    | -                     | -                | -                     |
| Nasal (C30)                       | -                    | -                     | -                    | -                     | -                | -                     |
| Bone (C40, C41)                   | -                    | -                     | -                    | -                     | -                | -                     |
| Hodgkin Lymphoma <sup>3</sup>     | -                    | -                     | -                    | -                     | -                | -                     |

<sup>1</sup> Adjusted for age at baseline (age group categories), province of residence at baseline, and education level at baseline

<sup>2</sup> Incident primary cancers excluding non-melanoma skin cancer

<sup>3</sup> Cancers defined using ICD-O-3 Histology codes: Mesothelioma (9050–9055), Hodgkin lymphoma (9650–9667); non-Hodgkin lymphoma (9590–9596, 9670–9719, 9727–9729, 9823, 9827); Multiple myeloma (9731, 9732, 9734); Leukemia (9733, 9742, 9800–9801, 9805, 9820, 9826, 9831–9837, 9840, 9860–9861, 9863, 9866–9867, 9870–9876, 9891, 9895–9897, 9910, 9920, 9930–9931, 9940, 9945–9946, 9948, 9963–9964, 9823, 9827)

Note: case counts below 5 have been suppressed and all counts have been randomly rounded to base 5 in accordance with Statistics Canada disclosure rules
