# Supplementary material for: Cancer risks in a population-based study of 70,570 agricultural workers: results from the Canadian census health and Environment cohort (CanCHEC)
Source: Springer Nature journal article supplement (doi:10.1186/s12885-017-3346-x), 2017-05-19
Supplement: MOESM3 [file 12300470]

**Supplementary Table S3:** Hazard ratios (HR) and 95% confidence intervals (CI) for selected cancers with more than 100 cases among agricultural workers in CanCHEC (1991-2010), stratified by age at enrollment in 1991

| Cancer Site (ICD-O-3)             | 25 – 44 years |      |                       | 45 – 74 years |      |                       |
|-----------------------------------|---------------|------|-----------------------|---------------|------|-----------------------|
|                                   | Cases         | HR   | (95% CI) <sup>1</sup> | Cases         | HR   | (95% CI) <sup>1</sup> |
| Any cancer <sup>2</sup>           | 1570          | 0.91 | (0.87-0.96)           | 7945          | 1.05 | (1.03-1.08)           |
| Prostate (C61.9)                  | 200           | 0.89 | (0.77-1.03)           | 2430          | 1.26 | (1.21-1.32)           |
| Lung (C34)                        | 140           | 0.78 | (0.66-0.92)           | 1065          | 0.77 | (0.72-0.82)           |
| Colon (C18, C26.0)                | 105           | 0.86 | (0.70-1.05)           | 735           | 1.03 | (0.95-1.11)           |
| Breast (C50)                      | 230           | 0.92 | (0.80-1.04)           | 490           | 0.94 | (0.86-1.03)           |
| Non-Hodgkin Lymphoma <sup>3</sup> | 120           | 1.14 | (0.95-1.37)           | 510           | 1.19 | (1.08-1.30)           |
| Rectum (C19.9, C20.9)             | 85            | 1.08 | (0.87-1.35)           | 450           | 1.15 | (1.04-1.27)           |
| Bladder (C67)                     | 45            | 0.67 | (0.49-0.90)           | 435           | 0.97 | (0.88-1.08)           |
| Melanoma (C44)                    | 115           | 1.08 | (0.90-1.31)           | 250           | 1.25 | (1.09-1.42)           |
| Leukemia <sup>3</sup>             | 50            | 0.98 | (0.74-1.32)           | 290           | 1.30 | (1.15-1.47)           |
| Oral (C00-C14)                    | 60            | 0.88 | (0.69-1.14)           | 220           | 1.10 | (0.95-1.27)           |
| Lip (C00.0-C00.9)                 | 10            | 2.38 | (1.32-4.28)           | 100           | 2.28 | (1.79-2.91)           |
| Kidney (C64.9)                    | 55            | 0.62 | (0.47-0.82)           | 215           | 0.87 | (0.75-1.00)           |
| Stomach (C16)                     | 30            | 0.76 | (0.52-1.12)           | 230           | 1.06 | (0.92-1.21)           |
| Pancreas (C25)                    | 30            | 0.78 | (0.54-1.13)           | 215           | 1.13 | (0.97-1.30)           |
| Multiple Myeloma <sup>3</sup>     | 25            | 1.04 | (0.69-1.59)           | 135           | 1.22 | (1.01-1.46)           |
| Brain (C70-C72)                   | 50            | 1.12 | (0.84-1.50)           | 105           | 0.99 | (0.81-1.22)           |
| Thyroid (C73.9)                   | 50            | 0.99 | (0.75-1.30)           | 75            | 1.34 | (1.07-1.72)           |

<sup>1</sup> Adjusted for sex, province of residence at baseline, and education level at baseline

<sup>2</sup> Incident primary cancers excluding non-melanoma skin cancer

<sup>3</sup> Cancers defined using ICD-O-3 Histology codes: Mesothelioma (9050–9055), Hodgkin lymphoma (9650–9667); non-Hodgkin lymphoma (9590–9596, 9670–9719, 9727–9729, 9823, 9827); Multiple myeloma (9731, 9732, 9734); Leukemia (9733, 9742, 9800–9801, 9805, 9820, 9826, 9831–9837, 9840, 9860–9861, 9863, 9866–9867, 9870–9876, 9891, 9895–9897, 9910, 9920, 9930–9931, 9940, 9945–9946, 9948, 9963–9964, 9823, 9827)

Note: case counts below 5 have been suppressed and all counts have been randomly rounded to base 5 in accordance with Statistics Canada disclosure rules
